# Supplementary material for: Macrophage-stimulated microRNA expression in mural cells promotes transplantation-induced neointima formation
Source: PubMed Central journal article supplement (PMC5444729; doi:10.18632/oncotarget.16279), 2017-03-16
Supplement: oncotarget-08-30100-s001.pdf [file oncotarget-08-30100-s001.pdf]

## Macrophage-stimulated microRNA expression in mural cells promotes transplantation-induced neointima formation

### Supplementary Materials

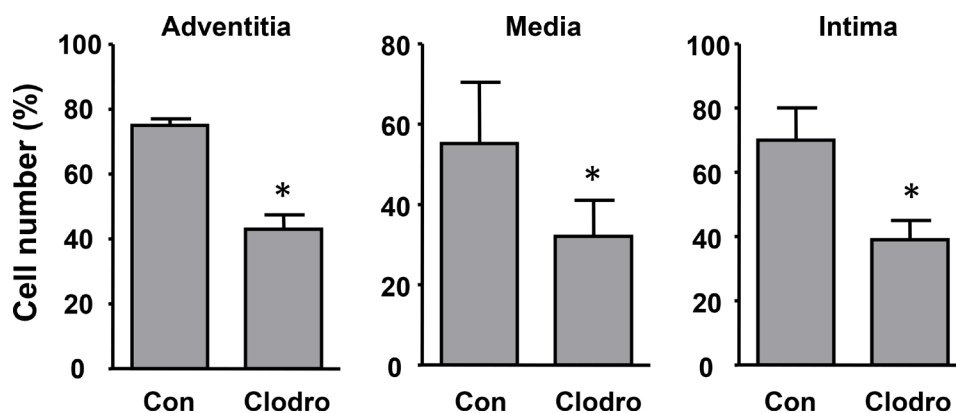

Supplementary Figure 1: Quantitative data showing that clodronate treatment reduced the abundance of PCNA<sup>+</sup> cells in all three layers of the vessel wall. Data were mean ± SD. \* $P < 0.05$  versus control, unpaired  $t$ -test,  $n = 6$  per group.

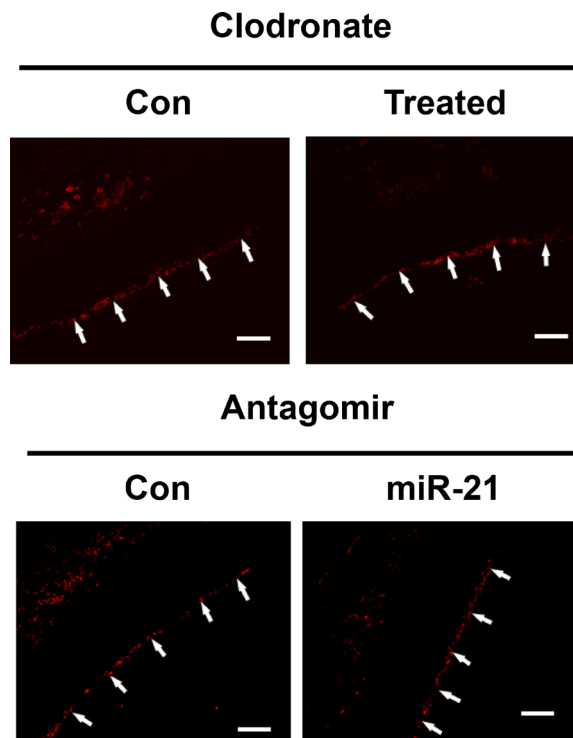

Supplementary Figure 2: Fluorescent staining of endothelium using DyLight 594-labeled *Lycopersicon* lectin in untreated and treated aortas, showing that clodronate liposome or miR-21 antagomir had no obvious effect on the integrity of the endothelial layer (arrows). Bar = 50  $\mu$ m.

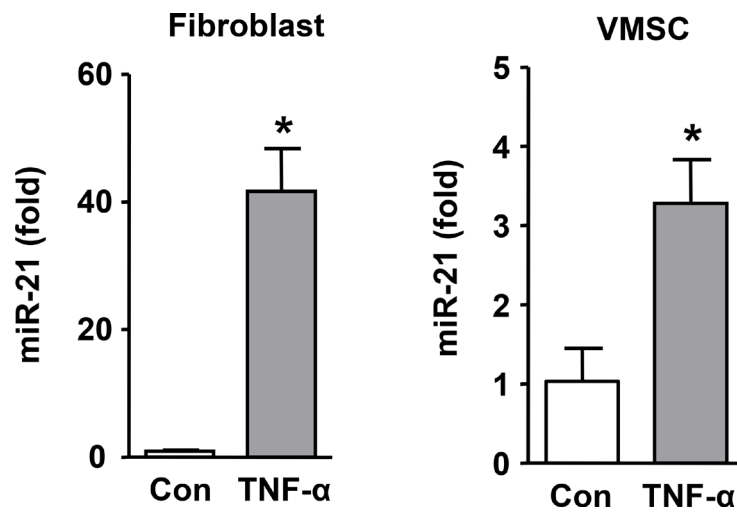

Supplementary Figure 3: PCR results showing that TNF- $\alpha$  treatment upregulated miR-21 expressions in primary fibroblasts and VSMCs. \* $P < 0.05$  vs control, unpaired  $t$ -test,  $n = 3$ .
